# Supplementary material
Source: MDPI journal article supplement (https://www.mdpi.com/2673-9879/4/1/13)
Supplement: s1 [file s1]

**Table S1.** Predicted physicochemical and ADME properties of the test compounds.

| Compounds                  |                                 | Compound-X | Compound-Y | Compound-Z | E4031   |
|----------------------------|---------------------------------|------------|------------|------------|---------|
| Physicochemical properties | MW                              | 441.488    | 442.472    | 442.476    | 415.559 |
|                            | ClogP                           | 1.7415     | 1.8649     | 1.2208     | 3.28902 |
|                            | Rotatable Bonds                 | 10         | 10         | 10         | 8       |
|                            | Acceptors                       | 7          | 7          | 8          | 5       |
|                            | Donors                          | 5          | 5          | 6          | 1       |
|                            | TPSA                            | 184.604    | 184.058    | 183.789    | 172.949 |
| Absorption                 | Water solubility (log mol/L)    | -2.907     | -2.911     | -2.903     | -4.414  |
|                            | Caco2 permeability (log Papp)   | -0.822     | -0.758     | -0.797     | 1.093   |
|                            | Intestinal absorption (%)       | 28.627     | 25.758     | 22.436     | 92.885  |
|                            | Skin Permeability (log Kp)      | -2.735     | -2.735     | -2.735     | -3.35   |
|                            | P-gp substrate                  | Yes        | Yes        | Yes        | Yes     |
|                            | P-gp I inhibitor                | No         | No         | No         | No      |
|                            | P-gp II inhibitor               | No         | No         | No         | Yes     |
|                            | VDss (human) (log L/kg)         | -0.62      | -0.25      | -0.224     | 0.677   |
| Distribution               | Fraction unbound                | 0.282      | 0.204      | 0.369      | 0.286   |
|                            | BBB permeability (log BB)       | -1.544     | -1.67      | -1.649     | -0.448  |
|                            | CNS permeability (log PS)       | -3.528     | -3.545     | -3.654     | -2.916  |
|                            | CYP2D6 substrate                | No         | No         | Yes        | No      |
| Metabolism                 | CYP3A4 substrate                | No         | No         | No         | Yes     |
|                            | CYP1A2 inhibitor                | No         | No         | No         | No      |
|                            | CYP2C19 inhibitor               | No         | No         | No         | No      |
|                            | CYP2C9 inhibitor                | No         | No         | No         | No      |
|                            | CYP2D6 inhibitor                | No         | No         | No         | No      |
|                            | CYP3A4 inhibitor                | No         | No         | No         | Yes     |
| Excretion                  | Total Clearance (log ml/min/kg) | 0.689      | 0.722      | 0.481      | 0.744   |
|                            | Renal OCT2 substrate            | No         | No         | No         | No      |

BBB: blood–brain barrier; CLogP o/w: lipophilicity (recommended value: LogP <5); CYP1A2: cytochrome P450 family 1 subfamily A member 2; CYP3A4: cytochrome P450 family 3 subfamily A member 4; CYP2C9: cytochrome P450 family 2 subfamily C member 9; CYP2C19: cytochrome P450 family 2 subfamily C member 19; CYP2D6: cytochrome P450 family 2 subfamily D member 6; Lipinski (criteria: MW≤500, LogP≤5, N or O ≤ 10, NH or OH≤5); MW: Molecular weight of the compounds; OCT2: organic cation transporter 2; P-gp: P-glycoprotein substrate; TPSA: topological polar surface area. Conclusions
